# Supplementary material
Source: PubMed Central journal article supplement (PMC4065847)
Supplement: NIHMS592319-supplement-1.pdf [file NIHMS592319-supplement-1.pdf]

Supplementary Figure 1

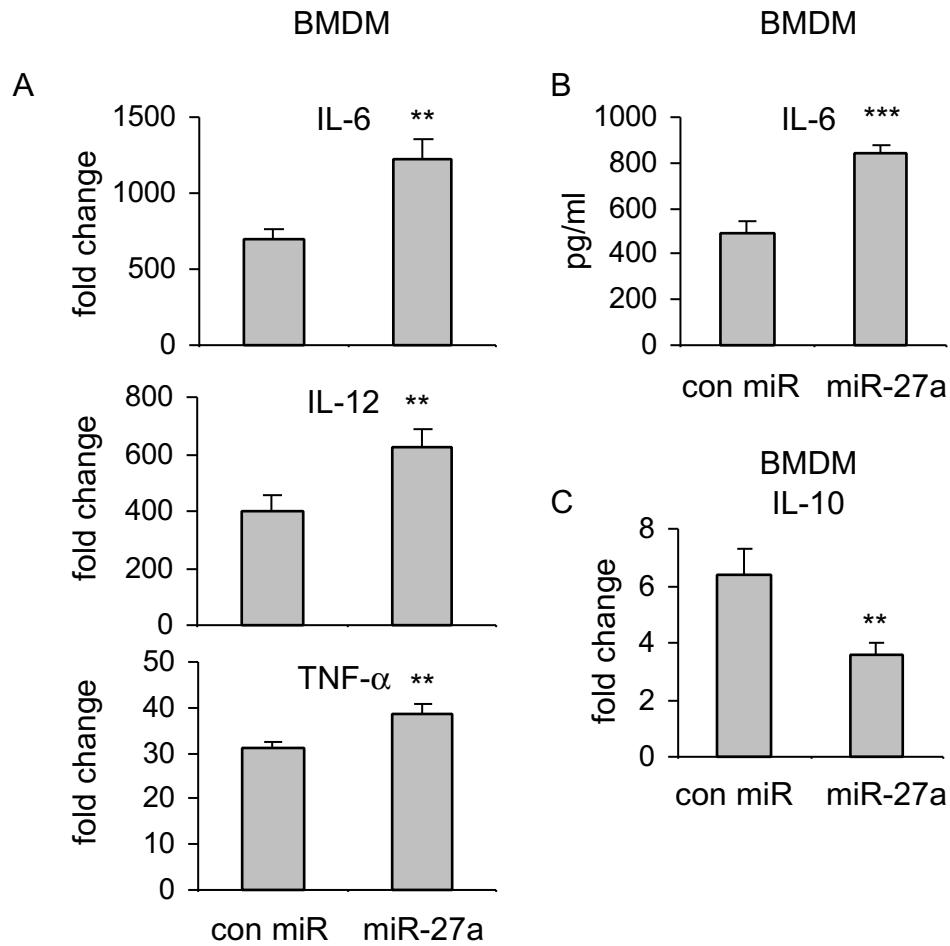

**Supplementary Figure 1: Upregulation of miR-27a enhances inflammatory response of macrophages after TLR4 stimulation.** (A-B) BMDMs were transfected with 20 nM control mimics or miR-27a mimics. 48h after transfection, cells were treated with 100 U/ml ultra-pure LPS for 6h. The mRNA or protein levels of pro-inflammatory cytokines, IL-6, IL-12 and TNF- $\alpha$ , were determined by real-time PCR and ELISA assays. (C) Experiments were performed as in "A". The mRNA levels of IL-10 were determined by real-time PCR. \*\* $p < 0.01$ , \*\*\* $p < 0.001$  compared to the "con miR" group. Experiments were done twice with similar results obtained.
